# Supplementary material
Source: bioRxiv or medRxiv preprint supplement (https://www.biorxiv.org/highwire/filestream/134117/field_highwire_adjunct_files/3/444521-12.pdf)
Supplement: Supplementary file [file 444521-12.pdf]

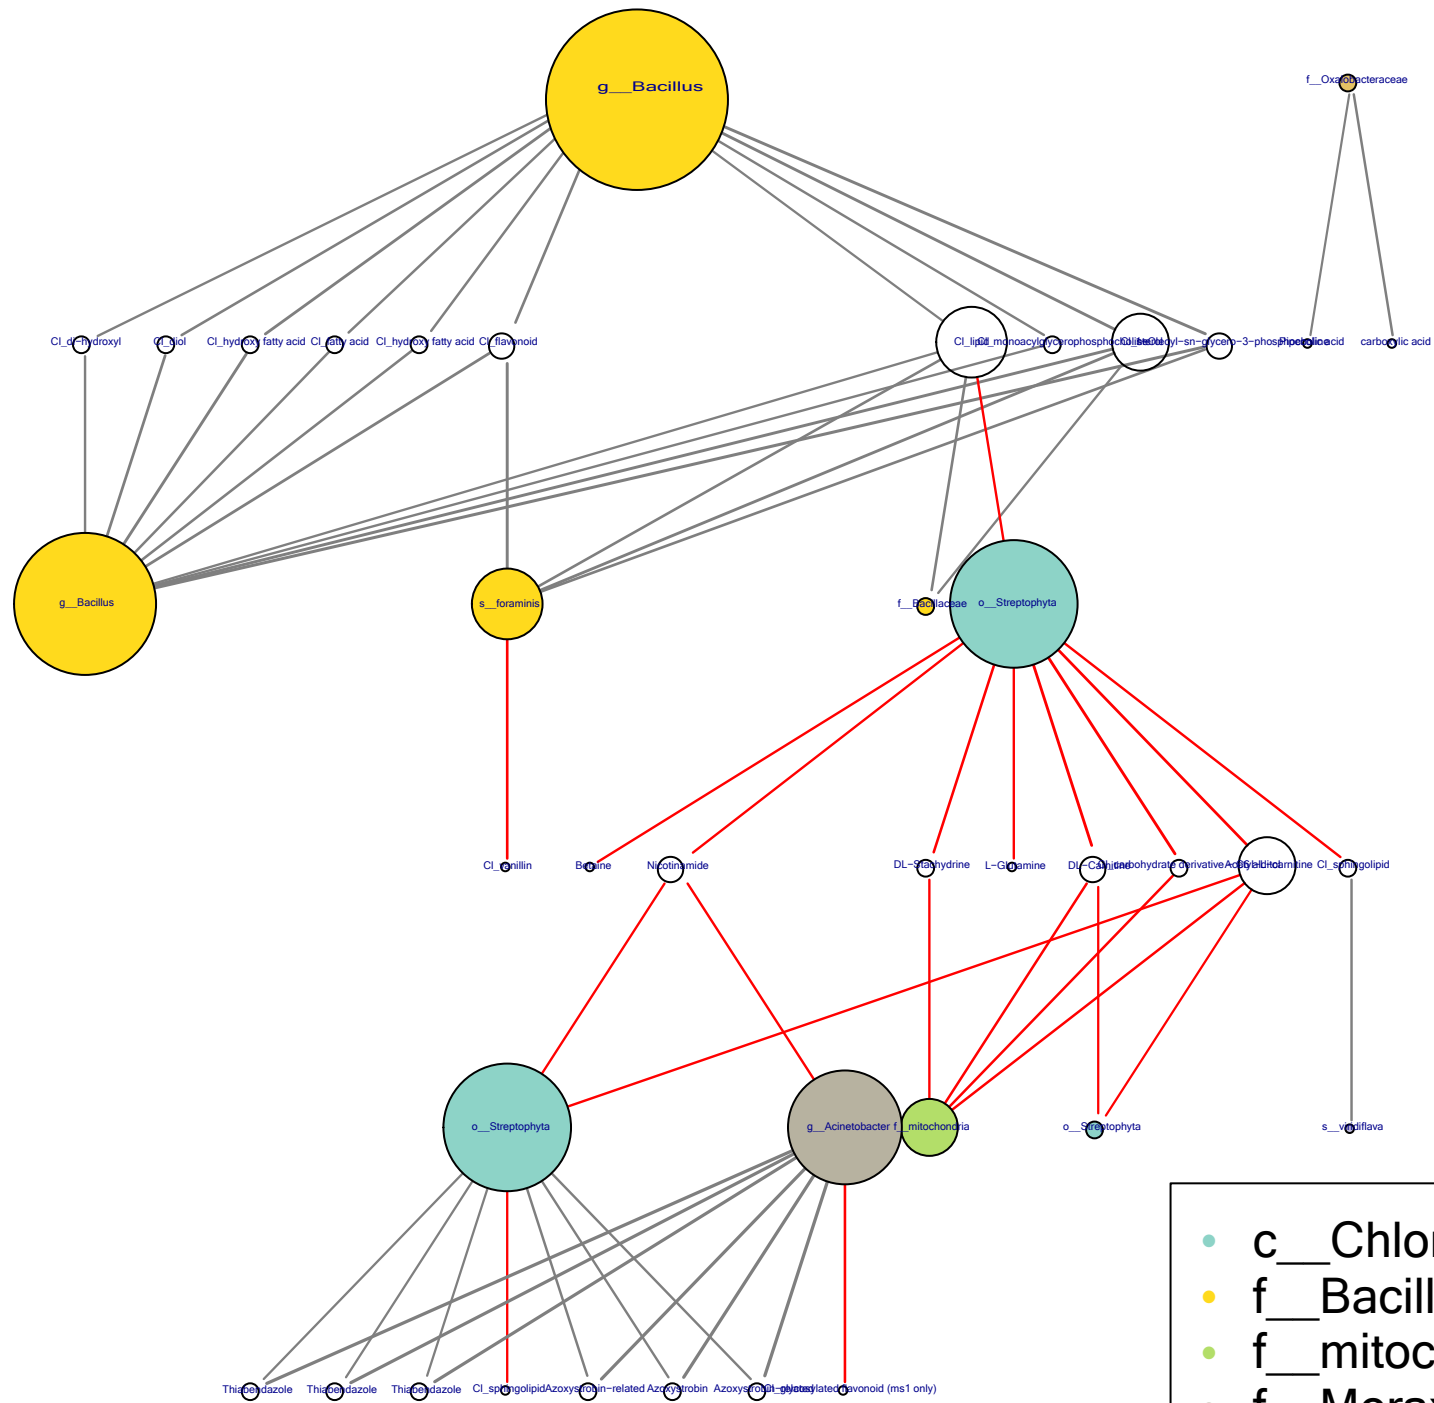

- c\_\_Chloroplast
- f\_\_Bacillaceae
- f\_\_mitochondria
- f\_\_Moraxellaceae
- f\_\_Oxalobacteraceae
- f\_\_Pseudomonadaceae
- Metabolite
